# Supplementary material for: RND2 attenuates apoptosis and autophagy in glioblastoma cells by targeting the p38 MAPK signalling pathway
Source: J Exp Clin Cancer Res. 2020 Aug 31;39:174. doi: 10.1186/s13046-020-01671-2 (PMC7457501; doi:10.1186/s13046-020-01671-2)
Supplement: Supplementary file 9 — Additional file 9. [file 13046_2020_1671_MOESM9_ESM.xlsx]

## Sheet: 工作表1
GAPDH
Forward Primer	GGAGCGAGATCCCTCCAAAAT
Reverse Primer	GGCTGTTGTCATACTTCTCATGG
RND2 （human)
Forward Primer	ACACTGCGAGCTTTGAGATCG
Reverse Primer	AGAGGCCGGACATTATCATAGT
RND2 （mouse)
Forward Primer	CGCTGCAAGATCGTAGTGGT
Reverse Primer	AGAATCCGGGTAGGCCAGAG
LC3B
Forward Primer	GATGTCCGACTTATTCGAGAGC
Reverse Primer	TTGAGCTGTAAGCGCCTTCTA
SQSTM1
Forward Primer	GACTACGACTTGTGTAGCGTC
Reverse Primer	GACTACGACTTGTGTAGCGTC
STAT3
Forward Primer	CAGCAGCTTGACACACGGTA
Reverse Primer	AAACACCAAAGTGGCATGTGA
Snail-1
Forward Primer	TCGGAAGCCTAACTACAGCGA
Reverse Primer	AGATGAGCATTGGCAGCGAG
p38
Forward Primer	TCAGTCCATCATTCATGCGAAA
Reverse Primer	AACGTCCAACAGACCAATCAC
p65
Forward Primer	ATGGGCAAGTCAGCTTCCAAA
Reverse Primer	GCCTCAGAATACTGTTGAGCCT
TP53
Forward Primer	GAGGTTGGCTCTGACTGTACC
Reverse Primer	TCCGTCCCAGTAGATTACCAC
shRND2-1
Forward	CGACATTAGCCGACCAGAAACA
Reverse	TACAGCCAACCAGCACAACCT
shRND2-2
Forward	GCTGTGGCTTTAGTTTTGTTGC
Reverse	CTCTGCTCTATCTGTGGACATGG
